# Supplementary material for: Walking the line between assessment, improvement and learning: a qualitative study on opportunities and risks of incorporating peer discussion of audit and feedback within quality improvement in general practice
Source: HighWire-hosted journal article supplement (doi:10.1136/bmjopen-2022-066793), 2023-01-01
Supplement: bmjopen-2022-066793supp002_data_supplement.pdf [file bmjopen-2022-066793supp002_data_supplement.pdf]

MAXQDA 2022

8-7-2022

## Title page

**Title:** Walking the line between assessment, improvement, and learning: an exploratory study on opportunities and risks of peer discussion of audit and feedback

**Corresponding author:** Dorien van der Winden, Amsterdam UMC location University of Amsterdam, Department of General Practice, Meibergdreef 9, Amsterdam, The Netherlands, d.vanderwinden@amsterdamumc.nl

**Co-authors:** Nynke van Dijk<sup>1</sup>, Mechteld Visser<sup>1</sup>, Jettie Bont<sup>1</sup>

1. Amsterdam UMC location University of Amsterdam, Department of General Practice, Meibergdreef 9, Amsterdam, The Netherlands

**Word count:** 5351

**Key words:** clinical audit, continuing medical education, formative feedback, general practice, peer group

MAXQDA 2022

8-7-2022

## Code System 'Walking the Line between assessment, improvement, and learning: an exploratory study on opportunities and risks of peer discussion of audit and feedback'

| Code system                                                                                              |
|----------------------------------------------------------------------------------------------------------|
| Opportunities                                                                                            |
| Opportunities\reaching deeper levels of reflection                                                       |
| Opportunities\reaching deeper levels of reflection\GPs                                                   |
| Opportunities\reaching deeper levels of reflection\GPs\uncovering blind spots                            |
| Opportunities\reaching deeper levels of reflection\GPs\group asking different questions                  |
| Opportunities\reaching deeper levels of reflection\GPs\group offering different solution                 |
| Opportunities\reaching deeper levels of reflection\GPs\group encouraging to improve                      |
| Opportunities\reaching deeper levels of reflection\Insurance companies                                   |
| Opportunities\reaching deeper levels of reflection\Insurance companies\ group asking different questions |
| Opportunities\reaching deeper levels of reflection\Insurance companies \group encouraging to improve     |
| Opportunities\reaching deeper levels of reflection\POs                                                   |
| Opportunities\reaching deeper levels of reflection\POs\group discussion as second mirror                 |
| Opportunities\reaching deeper levels of reflection\POs\uncovering blind spots                            |
| Opportunities\reaching deeper levels of reflection\POs\group asking different questions                  |
| Opportunities\reaching deeper levels of reflection\patients                                              |
| Opportunities\reaching deeper levels of reflection\patients\improving together as a necessity            |
|                                                                                                          |

MAXQDA 2022

8-7-2022

|                                                                                                                |
|----------------------------------------------------------------------------------------------------------------|
| Opportunities\adding context to numbers                                                                        |
| Opportunities\ adding context to numbers \GPs                                                                  |
| Opportunities\ adding context to numbers \GPs\complexity of general practice care                              |
| Opportunities\ adding context to numbers \GPs\reality is different from numbers                                |
| Opportunities\ adding context to numbers \GPs\group adds context                                               |
| Opportunities\ adding context to numbers \Insurance companies                                                  |
| Opportunities\ adding context to numbers \Insurance companies\indicators are a starting point                  |
| Opportunities\ adding context to numbers \Insurance companies\GPs in the lead on meaning of numbers            |
| Opportunities\ adding context to numbers \POs                                                                  |
| Opportunities\ adding context to numbers \POs\complexity of general practice care                              |
| Opportunities\ adding context to numbers \POs\numbers simplify                                                 |
| Opportunities\ adding context to numbers \POs\group adds context                                               |
| Opportunities\ adding context to numbers \patients                                                             |
| Opportunities\ adding context to numbers \patients\numbers simplify                                            |
|                                                                                                                |
| Opportunities\taking more ownership                                                                            |
| Opportunities\ taking more ownership \GPs                                                                      |
| Opportunities\ taking more ownership \GPs\quality improvement is part of the profession                        |
| Opportunities\ taking more ownership \GPs\GPs should be in the lead                                            |
| Opportunities\ taking more ownership \GPs\GPs should be in the lead\ownership prevents constant accountability |

MAXQDA 2022

8-7-2022

|                                                                                                                   |
|-------------------------------------------------------------------------------------------------------------------|
| Opportunities\ taking more ownership \GPs\GPs should be in the lead\group can mobilize action                     |
| Opportunities\ taking more ownership \Insurance companies                                                         |
| Opportunities\ taking more ownership \Insurance companies\quality improvement is part of the profession           |
| Opportunities\ taking more ownership \Insurance companies\we would welcome GPs in the lead                        |
| Opportunities\ taking more ownership \POs                                                                         |
| Opportunities\ taking more ownership \POs\quality improvement is part of the profession                           |
| Opportunities\ taking more ownership \POs\GPs should be in the lead                                               |
| Opportunities\ taking more ownership \POs\GPs should be in the lead\ownership prevents constant accountability    |
| Opportunities\ taking more ownership \patients                                                                    |
| Opportunities\ taking more ownership \patients\trust in GPs                                                       |
|                                                                                                                   |
| Risks                                                                                                             |
| Risks\How to handle unwilling colleagues?                                                                         |
| Opportunities\How to handle unwilling colleagues?\GPs                                                             |
| Opportunities\How to handle unwilling colleagues?\GPs\some people won't participate                               |
| Opportunities\How to handle unwilling colleagues?\GPs\some people won't participate\they can be excellent doctors |
| Opportunities\How to handle unwilling colleagues?\Insurance companies                                             |
| Opportunities\How to handle unwilling colleagues?\Insurance companies\we need some form of control                |
| Opportunities\How to handle unwilling colleagues?\POs                                                             |
| Opportunities\How to handle unwilling colleagues?\POs\some people won't participate                               |

MAXQDA 2022

8-7-2022

Opportunities\How to handle unwilling colleagues?\POs\some people won't participate\their peers know who they are

Opportunities\How to handle unwilling colleagues?\POs\some people won't participate\group needs to take action

Opportunities\How to handle unwilling colleagues?\POs\some people won't participate\there are other mechanisms in order to reinforce adequate care

Opportunities\How to handle unwilling colleagues?\patients\we need some form of control

Risks\Lacking a safe group

Risks\Lacking a safe group\GPs

Risks\Lacking a safe group\GPs\most GPs are in a safe group

Risks\Lacking a safe group\GPs\not all groups are safe for learning

Risks\Lacking a safe group\GPs\not all groups are safe for learning\there can be competition

Risks\Lacking a safe group\POs

Risks\Lacking a safe group\POs\safe group should be available

Risks\patients should be involved

Risks\patients should be involved\GPs

Risks\patients should be involved\GPs\most important outcome is quality of life

Risks\patients should be involved\GPs\most important outcome is patient satisfaction

Risks\patients should be involved\GPs\patients could offer insight

Risks\patients should be involved\patients

Risks\patients should be involved\patients\patients are missing in peer quality cycle

MAXQDA 2022

8-7-2022

|                                                                                                              |
|--------------------------------------------------------------------------------------------------------------|
| Risks\patients should be involved\patients\patients could offer insight                                      |
| Risks\patients should be involved\POs                                                                        |
| Risks\patients should be involved\Insurance companies                                                        |
|                                                                                                              |
| Disagreement on transparency                                                                                 |
| Disagreement on transparency\we need some form of accountability                                             |
| Disagreement on transparency\we need some form of accountability\GPs should be able to decide on form        |
| Disagreement on transparency\we need some form of accountability\you cannot grade your own exam              |
| Disagreement on transparency\process evaluation                                                              |
| Disagreement on transparency\process evaluation\offering insight in that you participate should be plentiful |
| Disagreement on transparency\process evaluation\offering insight in how you participate should be plentiful  |
| Disagreement on transparency\process evaluation\besides process eval we need some outcome measurement        |
| Disagreement on transparency\outcome measurements                                                            |
| Disagreement on transparency\outcome measurements\outcome measurements should not be asked                   |
| Disagreement on transparency\outcome measurements\some form of outcome measurement should be offered         |
| Disagreement on transparency\outcome measurements\outcome measurement could impair safety of learning        |
| Disagreement on transparency\ambiguity                                                                       |
